# Supplementary material for: Bone Regeneration of Critical-Size Calvarial Defects in Rats Using Highly Pressed Nano-Apatite/Collagen Composites
Source: MDPI journal article supplement (doi:10.3390/ma15093376), 2022-05-08
Supplement: s1 [file s1]

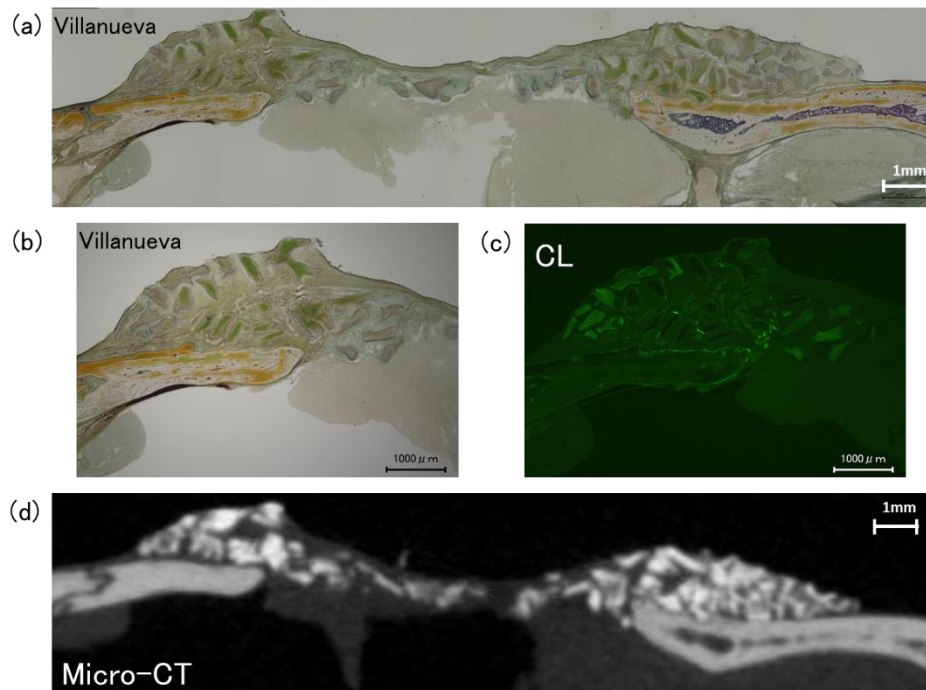

Figure S1: Villanueva-stained histological images of the zone obtained from the rat cranial bone defect filled with one commercial alloplast (Bio-Oss) at 8 weeks after surgery at low magnification (a) and high magnification (b) with CL- fluorescent labeling (c); micro-CT sagittal section image (d).
